# Supplementary material
Source: PubMed Central journal article supplement (PMC8964269)
Supplement: NIHMS1787707-supplement-Supplemental_Table_1.pdf [file NIHMS1787707-supplement-Supplemental_Table_1.pdf]

| <b>Genome Type</b> | <b>Accession No.</b> | <b>Host</b> | <b>Isolate year</b> | <b>Isolate country</b>  |
|--------------------|----------------------|-------------|---------------------|-------------------------|
| HAdV-C1            | AF534906             | Human       | 1953                | Maryland, USA           |
| HAdV-C2            | AC_000007            | Human       | 1953                | Washington DC, USA      |
| HAdV-B3            | AY599834             | Human       | 1953                | Maryland, USA           |
| HAdV-E4            | AY594253             | Human       | 1952-1953           | Missouri, USA           |
| HAdV-C5            | AY339865             | Human       |                     |                         |
| HAdV-C6            | FJ349096             | Human       | 1953                | Washington DC, USA      |
| HAdV-B7            | AY594255             | Human       | 1954                | California, USA         |
| HAdV-D8            | AB448767             | Human       | 1955                | California, USA         |
| HAdV-D9            | AJ854486             | Human       | before 1956         | Massachusetts, USA      |
| HAdV-D10           | JN226746             | Human       | 1955                | California, USA         |
| HAdV-B11           | AY163756             | Human       | before 1956         | Massachusetts, USA      |
| HAdV-A12           | AC_000005            | Human       | 1951-1954           | Massachusetts, USA      |
| HAdV-D13           | JN226747             | Human       | 1955                |                         |
| HAdV-B14           | AY803294             | Human       | 1955                | Netherlands             |
| HAdV-D15           | AB562586             | Human       | 1955                | Saudi Arabia            |
| HAdV-B16           | AY601636             | Human       | 1955                | Saudi Arabia            |
| HAdV-D17           | HQ910407             | Human       | 1955                | Saudi Arabia            |
| HAdV-A18           | GU191019             | Human       | 1954                | Washington DC, USA      |
| HAdV-D19           | JQ326209             | Human       | before 1982         | USA                     |
| HAdV-D20           | JN226749             | Human       | 1955                | Saudi Arabia            |
| HAdV-B21           | AY601633             | Human       | 1956                | Saudi Arabia            |
| HAdV-D22           | FJ619037             | Human       | 1956                | Saudi Arabia            |
| HAdV-D23           | JN226750             | Human       | 1956                | Saudi Arabia            |
| HAdV-D24           | JN226751             | Human       | 1956                | Saudi Arabia            |
| HAdV-D25           | JN226752             | Human       | 1956                | Washington DC, USA      |
| HAdV-D26           | EF153474             | Human       | 1956                | Washington DC, USA      |
| HAdV-D27           | JN226753             | Human       | 1958                | Washington DC, USA      |
| HAdV-D28           | FJ824826             | Human       | 1958                | Washington DC, USA      |
| HAdV-D29           | JN226754             | Human       | 1959                | Washington DC, USA      |
| HAdV-D30           | JN226755             | Human       | 1959                | Washington DC, USA      |
| HAdV-A31           | AM749299             | Human       | 1963                | England                 |
| HAdV-D32           | JN226756             | Human       | 1965                |                         |
| HAdV-D33           | JN226758             | Human       | 1965                |                         |
| HAdV-B34           | AY737797             | Human       | 1972                |                         |
| HAdV-B35           | AY128640             | Human       | Before 1975         |                         |
| HAdV-D36           | GQ384080             | Human       |                     |                         |
| HAdV-D37           | AB448778             | Human       | 1976                | Neitherlands            |
| HAdV-D38           | JN226759             | Human       |                     | Oostrhout, Neitherlands |
| HAdV-D39           | JN226760             | Human       | 1977                | El Salvador             |
| HAdV-F40           | NC_001454            | Human       | 1979                | Neitherlands            |
| HAdV-F41           | DQ315364             | Human       | 1973                | Neitherlands            |
| HAdV-D42           | JN226761             | Human       | 1982                | Paris, France           |
| HAdV-D43           | JN226762             | Human       | 1981                | California, USA         |
| HAdV-D44           | JN226763             | Human       | 1982                | New York, USA           |
| HAdV-D45           | JN226764             | Human       | 1982                | New York, USA           |
| HAdV-D46           | AY875648             | Human       | 1983                | New York, USA           |
| HAdV-D47           | JN226757             | Human       | 1982                | Georgia, USA            |
| HAdV-D48           | EF153473             | Human       |                     |                         |
| HAdV-D49           | DQ393829             | Human       |                     |                         |

|          |            |                    |           |                            |
|----------|------------|--------------------|-----------|----------------------------|
| HAdV-B50 | AY737798   | Human              | 1988      | Amsterdam, Neitherlands    |
| HAdV-D51 | JN226765   | Human              | 1989      | Amsterdam, Neitherlands    |
| HAdV-G52 | DQ923122   | Human              | 2003      | Los Angeles, USA           |
| HAdV-D53 | FJ169625   | Human              | 2005      | Germany                    |
| HAdV-D54 | AB333801   | Human              | 2000      | Kobe, Japan                |
| HAdV-B55 | FJ643676   | Human              | 2006      | Shanxi, China              |
| HAdV-D56 | HM770721   | Human              | 2008      | France                     |
| HAdV-C57 | HQ003817   | Human              | 2001      | Baku, Azerbaijan           |
| HAdV-D58 | HQ883276   | Human              | 1996      | Argentina                  |
| HAdV-D59 | JF799911   | Human              | 2007      | USA                        |
| HAdV-D60 | HQ007053   | Human              | 2008      | Edmonton, Canada           |
| HAdV-A61 | JF964962   | Human              | 2004      | Kyoto, Japan               |
| HAdV-D62 | JN162671   | Human              | 1993      | Manchester, United Kingdom |
| HAdV-D63 | JN935766   | Human              | 1959      | USA                        |
| HAdV-D64 | EF121005   | Human              | 1993      | USA                        |
| HAdV-D65 | AP012285   | Human              | 2004-2005 | Bangladesh                 |
| HAdV-B66 | JN860676   | Human              | 1987      | Argentina                  |
| HAdV-D67 | AP012302   | Human              | 2005      | Dhaka City, Bangladesh     |
| HAdV-B68 | JN860678   | Human              | 2004      | Argentina                  |
| HAdV-D69 | JN226748   | Human              | 1955      | Saudi Arabia               |
| HAdV-D70 | KP641339   | Human              | 2013      | Germany                    |
| HAdV-D71 | KF268207   | Human              | 1987      | Germany                    |
| HAdV-D72 | KF268335   | Human              | 1985      | Germany                    |
| HAdV-D73 | KY618676   | Human              | 2015      | Germany                    |
| HAdV-D74 | KY618677   | Human              | 2015      | Germany                    |
| HAdV-D75 | KY618678   | Human              | 2015      | Germany                    |
| HAdV-B76 | KF633445   | Human              |           | Germany                    |
| HAdV-B77 | KF268328   | Human              | 1985      | Germany                    |
| HAdV-B78 | KT970440   | Human              | 2000      | Argentina                  |
| HAdV-B79 | LC177352   | Human              | 2015      | Fukuoka, Japan             |
| HAdV-D80 |            | Human              | 2014      | Germany                    |
| HAdV-D81 | AB765926.1 | Human              | 2012      | Japan                      |
| HAdV-D82 | LC066535.1 | Human              | 2011      | Osaka, Japan               |
| HAdV-D83 | KX827426.1 | Human              | 2010      | Paris, France              |
| HAdV-D84 | MF416150   | Human              | 2011      | Panama                     |
| KF268206 | KF268206   | Human              | 1984      | Germany                    |
| KF268315 | KF268315   | Human              | 1988      | Germany                    |
| KF268327 | KF268327   | Human              | 1988      | Germany                    |
| KF268320 | KF268320   | Human              | 1987      | Germany                    |
| KF268332 | KF268332   | Human              | 1986      | Germany                    |
| KF268211 | KF268211   | Human              | 1987      | Germany                    |
| KF268330 | KF268330   | Human              | 1986      | Germany                    |
| KF268324 | KF268324   | Human              | 1988      | Germany                    |
| KF268312 | KF268312   | Human              | 1984      | Germany                    |
| KF268322 | KF268322   | Human              | 1986      | Germany                    |
| KF268208 | KF268208   | Human              |           | Germany                    |
| KF268325 | KF268325   | Human              | 1986      | Germany                    |
| KF268334 | KF268334   | Human              | 1988      | Germany                    |
| KF268201 | KF268201   | Human              | 1982      | Germany                    |
| SAdV-1   | NC_006879  | Cynomolgus Macaque | 1954      |                            |
| SAdV-3   | NC_006144  | Rhesus Macaque     | 1955      |                            |

|           |            |                      |      |                            |
|-----------|------------|----------------------|------|----------------------------|
| SAdV-7    | DQ792570   | Rhesus Macaque       |      |                            |
| SAdV-8    | KP329561.1 | Cynomolgus Macaque   | 1958 |                            |
| SAdV-11   | KP329562   | Rhesus Macaque       | 1958 |                            |
| SAdV-13   | KP329563   | Macaque              | 1958 |                            |
| SAdV-16   | KP329564   | Vervet Monkey        | 1965 |                            |
| SAdV-21   | AC_000010  | Chimpanzee           | 1954 | Maryland, USA              |
| SAdV-22   | AY530876   | Chimpanzee           |      |                            |
| SAdV-23   | AY530877   | Chimpanzee           |      |                            |
| SAdV-24   | AY530878   | Chimpanzee           |      |                            |
| SAdV-25   | AC_000011  | Chimpanzee           |      |                            |
| SAdV-25.1 | AF394196   | Chimpanzee           |      |                            |
| SAdV-18   | FJ025931   | Rhesus Macaque       |      |                            |
| TMAAdV    | HQ913600   | Titi Monkey          | 2009 | California, USA            |
| SAdV-19   | NC_028107  | Yellow Baboon        | 1963 |                            |
| SAdV-20   | HQ605912.1 | African Green Monkey |      |                            |
| SAdV-25.2 | FJ025918   | Chimpanzee           |      | Texas, USA                 |
| SAdV-26   | FJ025923   | Chimpanzee           |      | Louisiana, USA             |
| SAdV-27.1 | FJ025909   | Chimpanzee           |      | Louisiana, USA             |
| SAdV-27.2 | FJ025928   | Western Gorilla      |      | Atlanta, USA               |
| SAdV-28.1 | FJ025914   | Chimpanzee           |      | Louisiana, USA             |
| SAdV-28.2 | FJ025915   | Western Gorilla      |      | Buffalo, USA               |
| SAdV-29   | FJ025916   | Chimpanzee           |      | Louisiana, USA             |
| SAdV-30   | FJ025920   | Chimpanzee           |      | Louisiana, USA             |
| SAdV-31.1 | FJ025906   | Chimpanzee           |      | Louisiana, USA             |
| SAdV-31.2 | FJ025904   | Chimpanzee           |      | Mississippi, USA           |
| SAdV-32   | FJ025911   | Chimpanzee           |      | Louisiana, USA             |
| SAdV-33   | FJ025908   | Chimpanzee           |      | Louisiana, USA             |
| SAdV-34   | FJ025905   | Chimpanzee           |      | Louisiana, USA             |
| SAdV-35.1 | FJ025912   | Chimpanzee           |      | Louisiana, USA             |
| SAdV-35.2 | FJ025910   | Bonobo               |      | San Diego, California, USA |
| SAdV-36   | FJ025917   | Chimpanzee           |      | Texas, USA                 |
| SAdV-37.1 | FJ025921   | Chimpanzee           |      | Louisiana, USA             |
| SAdV-37.2 | FJ025919   | Bonobo               |      | San Diego, California, USA |
| SAdV-38   | FJ025922   | Chimpanzee           |      | Louisiana, USA             |
| SAdV-39   | FJ025924   | Chimpanzee           |      | Louisiana, USA             |
| SAdV-40.1 | FJ025907   | Chimpanzee           |      | Louisiana, USA             |
| SAdV-40.2 | FJ025926   | Chimpanzee           |      | Arkansas, USA              |
| SAdV-41.1 | FJ025913   | Western Gorilla      |      | Buffalo, USA               |
| SAdV-41.2 | FJ025927   | Western Gorilla      |      | Atlanta, USA               |
| SAdV-42.1 | FJ025903   | Bonobo               |      | San Diego, California, USA |
| SAdV-42.2 | FJ025902   | Bonobo               |      | Mississippi, USA           |
| SAdV-42.3 | FJ025925   | Bonobo               |      | Mississippi, USA           |
| SAdV-43   | FJ025900   | Western Gorilla      |      | Atlanta, USA               |
| SAdV-44   | FJ025899   | Bonobo               |      | Mississippi, USA           |
| SAdV-45   | FJ025901   | Western Gorilla      |      | Mississippi, USA           |
| SAdV-46   | FJ025930   | Western Gorilla      |      | Arkansas, USA              |
| SAdV-47   | FJ025929   | Western Gorilla      |      | Atlanta, USA               |
| SAdV-48   | HQ241818   | Cynomolgus Macaque   | 2008 | Philadelphia, Pennsylvania |
| SAdV-49   | HQ241819   | Cynomolgus Macaque   | 2008 | Philadelphia, Pennsylvania |
| SAdV-50   | HQ241820   | Cynomolgus Macaque   | 2008 | Philadelphia, Pennsylvania |
| DM-2014   | KM190146.1 | Rhesus Macaque       | 2012 | USA                        |

|            |            |                           |      |                  |
|------------|------------|---------------------------|------|------------------|
| CynAdV-1   | KT013209.1 | Cynomolgus Macaque        | 2004 | United Kingdom   |
| Y25        | JN254802   | Chimpanzee                | 1969 | Maryland, USA    |
| SAdV-WIV19 | KX505867.1 | Golden snub-nosed monkeys | 2014 | China            |
| A1173      | JN880450.1 | Rhesus macaque            | 2009 | USA              |
| A1285      | JN880452   | Rhesus macaque            | 2009 | USA              |
| A1312      | JN880454   | Rhesus macaque            | 2009 | USA              |
| A1139      | JN880448   | Rhesus macaque            | 2009 | USA              |
| A1163      | JN880449   | Rhesus macaque            | 2009 | USA              |
| A1258      | JN880451   | Rhesus macaque            | 2009 | USA              |
| A1296      | JN880453   | Rhesus macaque            | 2009 | USA              |
| A1327      | JN880455   | Rhesus macaque            | 2009 | USA              |
| A1335      | JN880456   | Rhesus macaque            | 2009 | USA              |
| BaAdV-1    | KC693021   | Olive baboon              | 1997 | Texas, USA       |
| BaAdV-2    | KC693022   | Olive baboon              | 1997 | Texas, USA       |
| BaAdV-3    | KC693023   | Olive baboon              | 1997 | Texas, USA       |
| BaAdV-4    | KC693024   | Olive baboon              | 1997 | Texas, USA       |
| TAdV-1     | GU936707   | Turkey                    | 2001 | Hungary          |
| FAdV-B5    | KC493646   | Fowl                      | 1970 | Northern Ireland |
| LiAdV-2    | KJ156523   | Lizard                    | 2006 | Germany          |
| SnAdV-1    | DQ106414   | Snake                     |      | Germany          |
| FrAdV-1    | AF224336   | Leopard Frog              |      |                  |
| CSPAdV-2   | KP144329   | Chinstrap Penguin         | 2010 | Antarctica       |
| TAV        | AC_000190  | Tree Shrew                |      |                  |
