# Supplementary material
Source: PubMed Central journal article supplement (PMC8964269)
Supplement: NIHMS1787707-supplement-Supplemental_Table_2.pdf [file NIHMS1787707-supplement-Supplemental_Table_2.pdf]

| Number | Gene alignment | Protein alignment | Nt Pos | Nt change | AA pos | AA change | Node location | Gene Symbol |
|--------|----------------|-------------------|--------|-----------|--------|-----------|---------------|-------------|
| 1      | E1a_28k_nt.aln | E1a_28K_aa.aln    | 220    | G-->C     | 74     | A-->Q     | 275 -->230    | E1A 28K     |
| 2*     | E1a_28k_nt.aln | E1a_28K_aa.aln    | 771    | C-->T     | 256    | D-->D     | 322-->321     | E1A 28K     |
| 3      | E1b19_nt.aln   | E1b19_aa.aln      | 319    | A-->T     | 107    | T-->S     | 322-->321     | E1B 19K     |
| 4      | E1b_nt.aln     | E1a55_aa.aln      | 977    | C-->G     | 225    | P-->A     | 275 -->230    | E1B 55K     |
| 5      | E1b_nt.aln     | E1a55_aa.aln      | 1066   | C-->G     | 255    | T-->S     | 275-->230     | E1B 55K     |
| 6      | E1b_nt.aln     | E1a55_aa.aln      | 1117   | T-->C     | 271    | V-->A     | 275-->230     | E1B 55K     |
| 7      | E1b_nt.aln     | E1a55_aa.aln      | 1212   | A-->C     | 303    | K-->Q     | 275-->230     | E1B 55K     |
| 8      | E1b_nt.aln     | E1a55_aa.aln      | 1377   | C-->A     | 358    | Q-->N     | 275-->230     | E1B 55K     |
| 9      | E1b_nt.aln     | E1a55_aa.aln      | 823    | G-->A     | 275    | C-->N     | 274-->273     | E1B 55K     |
| 10     | E1b_nt.aln     | E1a55_aa.aln      | 1109   | T-->G     | 370    | F-->C     | 322-->321     | E1B 55K     |
| 11     | pIX_nt.aln     | pIX_aa.aln        | 37     | C-->T     | 19     | P-->S     | 288-->279     | pIX         |
| 12     | IVa2_nt.aln    | IVa2_aa.aln       | 1348   | T-->C     | 358    | V-->A     | 275-->230     | IVa2        |
| 13     | IVa2_nt.aln    | IVa2_aa.aln       | 1183   | G-->C     | 395    | E-->Q     | 288-->279     | IVa2        |
| 14     | IVa2_nt.aln    | IVa2_aa.aln       | 756    | C-->T     | 252    | T-->I     | 288-->279     | IVa2        |
| 15     | IVa2_nt.aln    | IVa2_aa.aln       | 1047   | T-->A     | 350    | S-->T     | 322-->321     | IVa2        |
| 16     | IVa2_nt.aln    | IVa2_aa.aln       | 859    | G-->A     | 286    | G-->S     | 322-->321     | IVa2        |
| 17     | IVa2_nt.aln    | IVa2_aa.aln       | 682    | C-->A     | 228    | P-->I     | 274-->273     | IVa2        |
| 18     | IVa2_nt.aln    | IVa2_aa.aln       | 396    | G-->C     | 133    | E-->Q     | 322-->321     | IVa2        |
| 19*    | IVa2_nt.aln    | IVa2_aa.aln       | 352    | C-->T     | 118    | L-->L     | 322-->321     | IVa2        |
| 20     | IVa2_nt.aln    | IVa2_aa.aln       | 140    | A-->C     | 47     | E-->A     | 315-->314     | IVa2        |
| 21     | Pol_nt.aln     | Pol_aa.aln        | 3268   | C-->A     | 1089   | L-->I     | 322-->321     | Pol         |
| 22     | Pol_nt.aln     | Pol_aa.aln        | 3133   | C-->T     | 1044   | L-->S     | 322-->321     | pol         |
| 22     | Pol_nt.aln     | Pol_aa.aln        | 2857   | G-->A     | 953    | D-->N     | 322-->321     | Pol         |
| 23*    | Pol_nt.aln     | Pol_aa.aln        | 2721   | T-->C     | 907    | S-->S     | 322-->321     | Pol         |
| 24     | Pol_nt.aln     | Pol_aa.aln        | 2272   | T-->G     | 758    | C-->A     | 322-->321     | Pol         |
| 25     | Pol_nt.aln     | Pol_aa.aln        | 1659   | A-->C     | 554    | K-->Q     | 315-->314     | Pol         |
| 26     | Pol_nt.aln     | Pol_aa.aln        | 1006   | G-->A     | 336    | A-->K     | 322-->321     | Pol         |
| 27     | Pol_nt.aln     | Pol_aa.aln        | 1013   | T-->A     | 338    | F-->Y     | 315-->314     | Pol         |
| 28     | Pol_nt.aln     | Pol_aa.aln        | 137    | G-->A     | 45     | R-->H     | 322-->321     | pol         |
| 29     | pTP_nt.aln     | pTP_aa.aln        | 1851   | G-->A     | 618    | V-->I     | 322-->321     | pTP         |
| 30     | pTP_nt.aln     | pTP_aa.aln        | 1759   | A-->G     | 587    | I-->V     | 315-->314     | pTP         |
| 31     | pTP_nt.aln     | pTP_aa.aln        | 1570   | G-->A     | 524    | V-->I     | 322-->321     | pTP         |
| 32     | pTP_nt.aln     | pTP_aa.aln        | 1427   | A-->T     | 476    | H-->L     | 322-->321     | pTP         |
| 33     | pTP_nt.aln     | pTP_aa.aln        | 1342   | A-->C     | 447    | M-->L     | 322-->321     | pTP         |
| 34     | pTP_nt.aln     | pTP_aa.aln        | 518    | G-->A     | 173    | R-->Q     | 322-->321     | pTP         |
| 35*    | pTP_nt.aln     | pTP_aa.aln        | 250    | C-->T     | 94     | L-->L     | 288-->279     | pTP         |
| 36     | 52k_nt.aln     | 52k_aa.aln        | 256    | A-->C     | 86     | M-->L     | 315-->314     | L1 52K      |
| 37     | 52k_nt.aln     | 52k_aa.aln        | 341    | G->A      | 114    | R-->K     | 288-->279     | L1 52K      |
| 38     | 52k_nt.aln     | 52k_aa.aln        | 379    | G-->C     | 127    | V-->L     | 315-->314     | L1 52K      |
| 39     | 52k_nt.aln     | 52k_aa.aln        | 443    | A-->C     | 148    | K-->Q     | 315-->314     | L1 52K      |
| 40     | 52k_nt.aln     | 52k_aa.aln        | 558    | C-->G     | 185    | P-->A     | 315-->314     | L1 52K      |
| 41     | 52k_nt.aln     | 52k_aa.aln        | 632    | C-->T     | 211    | T-->M     | 288-->279     | L1 52K      |
| 42     | 52k_nt.aln     | 52k_aa.aln        | 695    | T-->A     | 232    | L-->Y     | 274-->260     | L1 52K      |
| 43     | 52k_nt.aln     | 52k_aa.aln        | 791    | A-->T     | 264    | Y-->F     | 274-->273     | L1 52K      |
| 44*    | 52k_nt.aln     | 52k_aa.aln        | 823    | C-->A     | 275    | R-->R     | 274-->273     | L1 52K      |

|     |                 |                 |         |         |     |       |           |             |
|-----|-----------------|-----------------|---------|---------|-----|-------|-----------|-------------|
| 45* | 52k_nt.aln      | 52k_aa.aln      | 961     | C-->A   | 321 | R-->R | 274-->260 | L1 52K      |
| 46  | 52k_nt.aln      | 52k_aa.aln      | 980     | G-->C   | 327 | G-->A | 275-->230 | L1 52K      |
| 47  | IIIa_nt.aln     | IIIa_aa.aln     | 85      | C-->G   | 29  | P-->A | 315-->314 | IIIa        |
| 48  | IIIa_nt.aln     | IIIa_aa.aln     | 130     | G-->T   | 44  | A-->S | 275-->230 | IIIa        |
| 49  | IIIa_nt.aln     | IIIa_aa.aln     | 440     | G-->C   | 147 | S-->A | 275-->230 | IIIa        |
| 50* | IIIa_nt.aln     | IIIa_aa.aln     | 670/671 | TC-->AG | 224 | S-->S | 275-->230 | IIIa        |
| 51* | IIIa_nt.aln     | IIIa_aa.aln     | 728     | C-->G   | 243 | S-->S | 315-->314 | IIIa        |
| 52  | IIIa_nt.aln     | IIIa_aa.aln     | 878     | G-->A   | 293 | S-->N | 274-->273 | IIIa        |
| 53  | IIIa_nt.aln     | IIIa_aa.aln     | 878     | A-->G   | 293 | E-->R | 275-->230 | IIIa        |
| 54  | IIIa_nt.aln     | IIIa_aa.aln     | 931     | C-->T   | 311 | Q-->L | 288-->279 | IIIa        |
| 55  | IIIa_nt.aln     | IIIa_aa.aln     | 1102    | A-->C   | 368 | M-->L | 274-->260 | IIIa        |
| 56  | III_nt.aln      | III_aa.aln      | 1080    | A-->C   | 357 | N-->T | 275-->230 | Penton base |
| 57  | III_nt.aln      | III_aa.aln      | 1072    | T-->G   | 358 | C-->G | 315-->314 | Penton base |
| 58  | III_nt.aln      | III_aa.aln      | 1169    | A-->G   | 390 | G-->A | 322-->321 | Penton base |
| 59  | III_nt.aln      | III_aa.aln      | 1274    | A-->T   | 425 | Q-->L | 275-->230 | Penton base |
| 60  | VII_nt.aln      | VII_aa.aln      | 460     | G-->A   | 153 | A-->T | 322-->321 | VII         |
| 61  | V_nt.aln        | V_aa.aln        | 598     | A-->C   | 200 | K-->R | 288-->279 | V           |
| 62  | X_nt.aln        | X_aa.aln        | 41      | A-->T   | 14  | Y-->F | 288-->279 | X           |
| 63* | X_nt.aln        | X_aa.aln        | 43      | C-->A   | 15  | R-->R | 322-->321 | X           |
| 64  | X_nt.aln        | X_aa.aln        | 100/101 | AG-->GC | 34  | A-->S | 322-->321 | X           |
| 65* | VI_nt.aln       | VI_aa.aln       | 46      | C-->A   | 16  | R-->R | 322-->321 | VI          |
| 66  | VI_nt.aln       | VI_aa.aln       | 59      | G-->C   | 20  | G-->A | 315-->314 | VI          |
| 67  | VI_nt.aln       | VI_aa.aln       | 154/155 | AA-->CG | 52  | K-->R | 275-->230 | VI          |
| 68  | VI_nt.aln       | VI_aa.aln       | 652     | N-->C   | 218 | N-->H | 275-->230 | VI          |
| 69* | Hexon_nt.aln    | Hexon_aa.aln    | 15      | G-->C   | 5   | S-->S | 315-->314 | Hexon       |
| 70  | Hexon_nt.aln    | Hexon_aa.aln    | 125     | G-->A   | 43  | G-->N | 288-->279 | Hexon       |
| 71* | Hexon_nt.aln    | Hexon_aa.aln    | 136     | A-->C   | 46  | R-->R | 315-->314 | Hexon       |
| 72  | Hexon_nt.aln    | Hexon_aa.aln    | 193     | C-->T   | 65  | T-->M | 274-->260 | Hexon       |
| 73  | Hexon_nt.aln    | Hexon_aa.aln    | 295     | A-->T   | 99  | T-->S | 322-->321 | Hexon       |
| 74  | Hexon_nt.aln    | Hexon_aa.aln    | 299     | A-->T   | 100 | Y-->F | 274-->260 | Hexon       |
| 75  | Hexon_nt.aln    | Hexon_aa.aln    | 1412    | G-->A   | 471 | R-->K | 275-->230 | Hexon       |
| 76* | Hexon_nt.aln    | Hexon_aa.aln    | 1571    | C-->A   | 524 | R-->R | 322-->321 | Hexon       |
| 77  | Hexon_nt.aln    | Hexon_aa.aln    | 1736    | G-->A   | 579 | S-->N | 322-->321 | Hexon       |
| 78  | Hexon_nt.aln    | Hexon_aa.aln    | 2105    | T-->A   | 702 | F-->Y | 288-->279 | Hexon       |
| 79  | Hexon_nt.aln    | Hexon_aa.aln    | 2185    | T-->G   | 729 | S-->A | 288-->279 | Hexon       |
| 80  | Hexon_nt.aln    | Hexon_aa.aln    | 2663    | C-->A   | 888 | T-->N | 274-->273 | Hexon       |
| 81  | Protease_nt.aln | Protease_aa.aln | 247     | A-->G   | 83  | I-->V | 288-->279 | Protease    |
| 82  | Protease_nt.aln | Protease_aa.aln | 320     | C-->G   | 97  | T-->S | 275-->230 | Protease    |
| 83  | Protease_nt.aln | Protease_aa.aln | 328     | A-->C   | 110 | K-->Q | 275-->230 | Protease    |
| 84  | Protease_nt.aln | Protease_aa.aln | 562     | C-->A   | 188 | H-->N | 322-->321 | Protease    |
| 85  | DBP_nt.aln      | DBP_aa.aln      | 1321    | C-->A   | 441 | P-->T | 315-->314 | DBP         |
| 86  | DBP_nt.aln      | DBP_aa.aln      | 1039    | T-->A   | 347 | F-->Y | 315-->314 | DBP         |
| 87* | DBP_nt.aln      | DBP_aa.aln      | 932     | TC-->AG | 311 | S-->S | 275-->230 | DBP         |
| 88  | DBP_nt.aln      | DBP_aa.aln      | 907     | G-->A   | 303 | D-->N | 315-->314 | DBP         |
| 89  | 100k_nt.aln     | 100k_aa.aln     | 775     | G-->A   | 259 | A-->I | 275-->230 | L4 100K     |
| 90  | 100k_nt.aln     | 100k_aa.aln     | 781     | C-->G   | 261 | P-->A | 275-->230 | L4 100K     |
| 91  | 100k_nt.aln     | 100k_aa.aln     | 818     | G-->C   | 273 | G-->A | 275-->230 | L4 100K     |
| 92  | 100k_nt.aln     | 100k_aa.aln     | 904     | A-->C   | 302 | M-->L | 275-->230 | L4 100K     |

|      |             |             |         |         |     |       |           |         |
|------|-------------|-------------|---------|---------|-----|-------|-----------|---------|
| 93   | 100k_nt.aln | 100k_aa.aln | 1103    | C-->T   | 368 | T-->I | 274-->273 | L4 100K |
| 94   | 100k_nt.aln | 100k_aa.aln | 1085    | G-->C   | 362 | C-->A | 315-->314 | L4 100K |
| 95   | 100k_nt.aln | 100k_aa.aln | 1087    | A-->C   | 363 | K-->Q | 315-->314 | L4 100K |
| 96   | 100k_nt.aln | 100k_aa.aln | 1070    | A-->G   | 357 | Y-->C | 275-->230 | L4 100K |
| 97   | 100k_nt.aln | 100k_aa.aln | 1484    | G-->C   | 495 | G-->A | 315-->314 | L4 100K |
| 98   | 100k_nt.aln | 100k_aa.aln | 1615    | G-->A   | 539 | E-->T | 322-->321 | L4 100K |
| 99   | 100k_nt.aln | 100k_aa.aln | 1781    | A-->G   | 594 | K-->R | 322-->321 | L4 100K |
| 100  | 100k_nt.aln | 100k_aa.aln | 1799    | T-->C   | 600 | L-->A | 315-->314 | L4 100K |
| 101  | 100k_nt.aln | 100k_aa.aln | 1805    | A-->T   | 602 | Y-->F | 275-->230 | L4 100K |
| 102  | 100k_nt.aln | 100k_aa.aln | 2026    | A-->C   | 676 | K-->R | 288-->279 | L4 100K |
| 103  | 100k_nt.aln | 100k_aa.aln | 2168    | A-->T   | 723 | E-->V | 275-->230 | L4 100K |
| 104  | 22k_nt.aln  | 22k_aa.aln  | 398     | G-->C   | 133 | G-->A | 315-->314 | L4 22K  |
| 105* | 22k_nt.aln  | 22k_aa.aln  | 421     | C-->A   | 141 | R-->R | 322-->321 | L4 22K  |
| 106* | 33k_nt.aln  | 33k_aa.aln  | 516     | A-->G   | 172 | K-->K | 275-->230 | L4 33K  |
| 107  | 33k_nt.aln  | 33k_aa.aln  | 533     | A-->T   | 178 | H-->L | 322-->321 | L4 33K  |
| 108  | VIII_nt.aln | VIII_aa.aln | 38      | A-->T   | 13  | Y-->F | 322-->321 | VIII    |
| 109  | VIII_nt.aln | VIII_aa.aln | 93      | G-->A   | 31  | M-->I | 288-->279 | VIII    |
| 110* | VIII_nt.aln | VIII_aa.aln | 151     | C-->A   | 51  | R-->R | 315-->314 | VIII    |
| 111  | VIII_nt.aln | VIII_aa.aln | 158     | A-->G   | 53  | Q-->R | 288-->279 | VIII    |
| 112  | VIII_nt.aln | VIII_aa.aln | 301     | A-->C   | 101 | M-->L | 274-->273 | VIII    |
| 113  | VIII_nt.aln | VIII_aa.aln | 440/441 | GC-->CA | 147 | S-->T | 322-->321 | VIII    |
| 114  | VIII_nt.aln | VIII_aa.aln | 494     | G-->A   | 165 | R-->N | 275-->230 | VIII    |
| 115* | VIII_nt.aln | VIII_aa.aln | 521     | C-->G   | 174 | S-->S | 275-->230 | VIII    |
| 116  | 34k_nt.aln  | 34k_aa.aln  | 398     | A-->G   | 133 | Q-->R | 274-->273 | E4 34K  |
| 117  | orf3_nt.aln | orf3_aa.aln | 302     | TG-->GT | 101 | C-->V | 288-->279 | E4 orf3 |
| 118  | orf2_nt.aln | orf2_aa.aln | 110     | T-->A   | 37  | F-->Y | 274-->260 | E4 orf2 |
| 119  | orf2_nt.aln | orf2_aa.aln | 20      | T-->G   | 7   | V-->C | 274-->273 | E4 orf2 |

\* Same base in an overlapping region.
