# Supplementary material
Source: PubMed Central journal article supplement (PMC8964269)

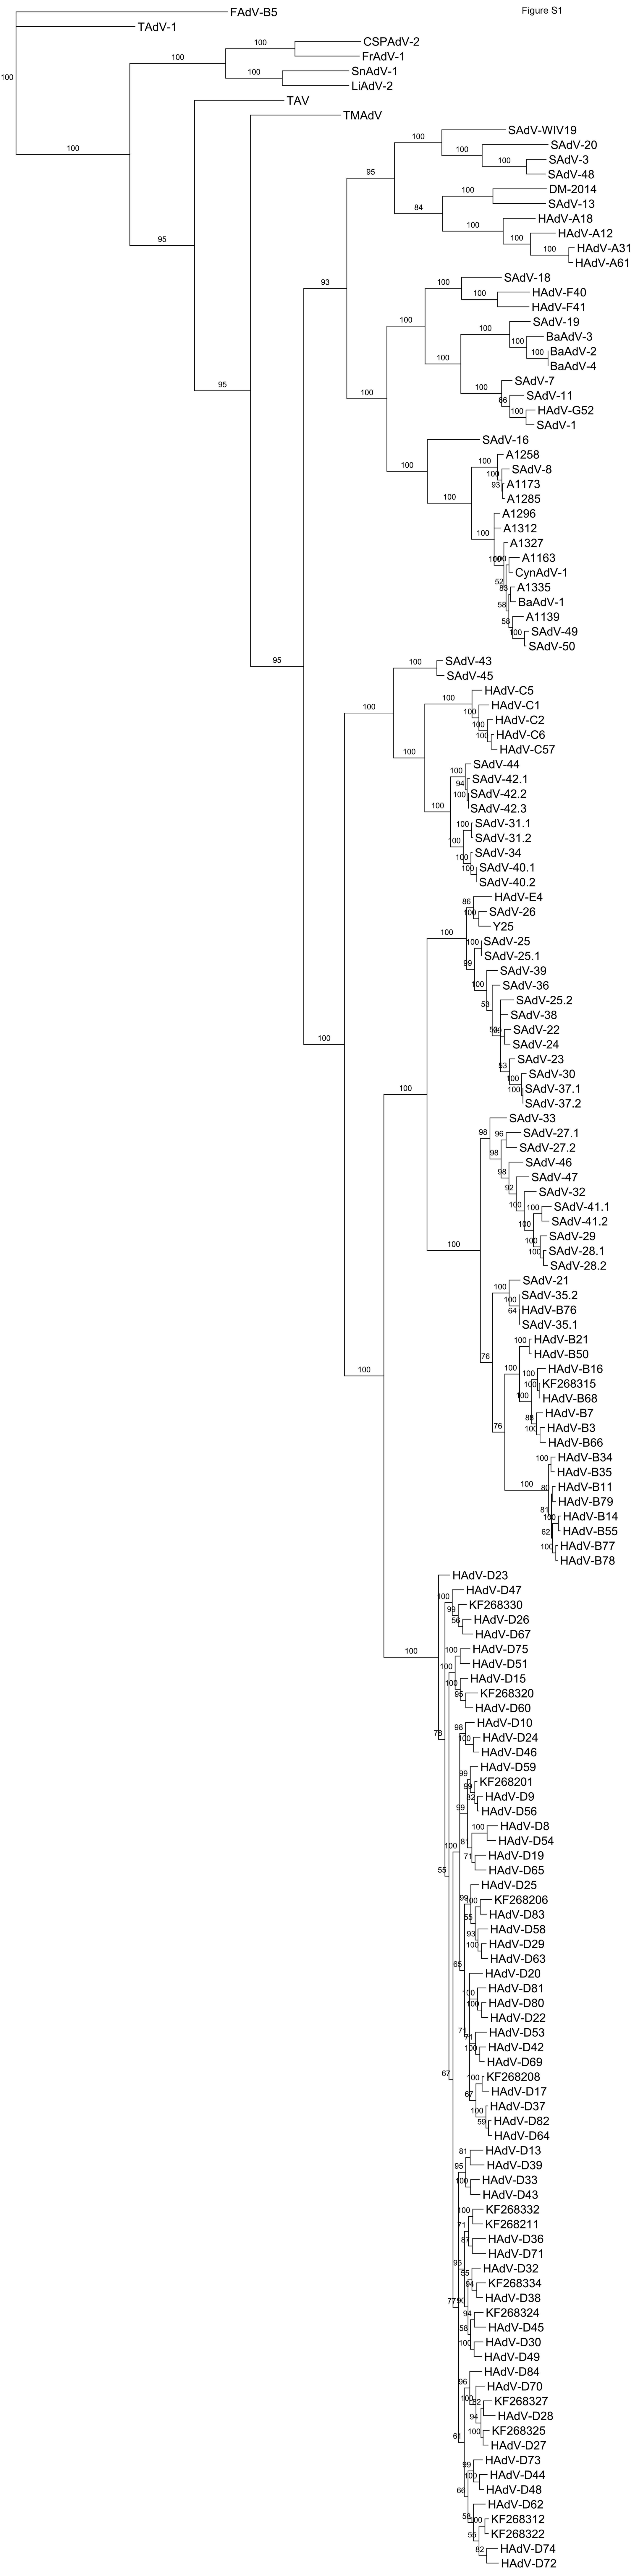

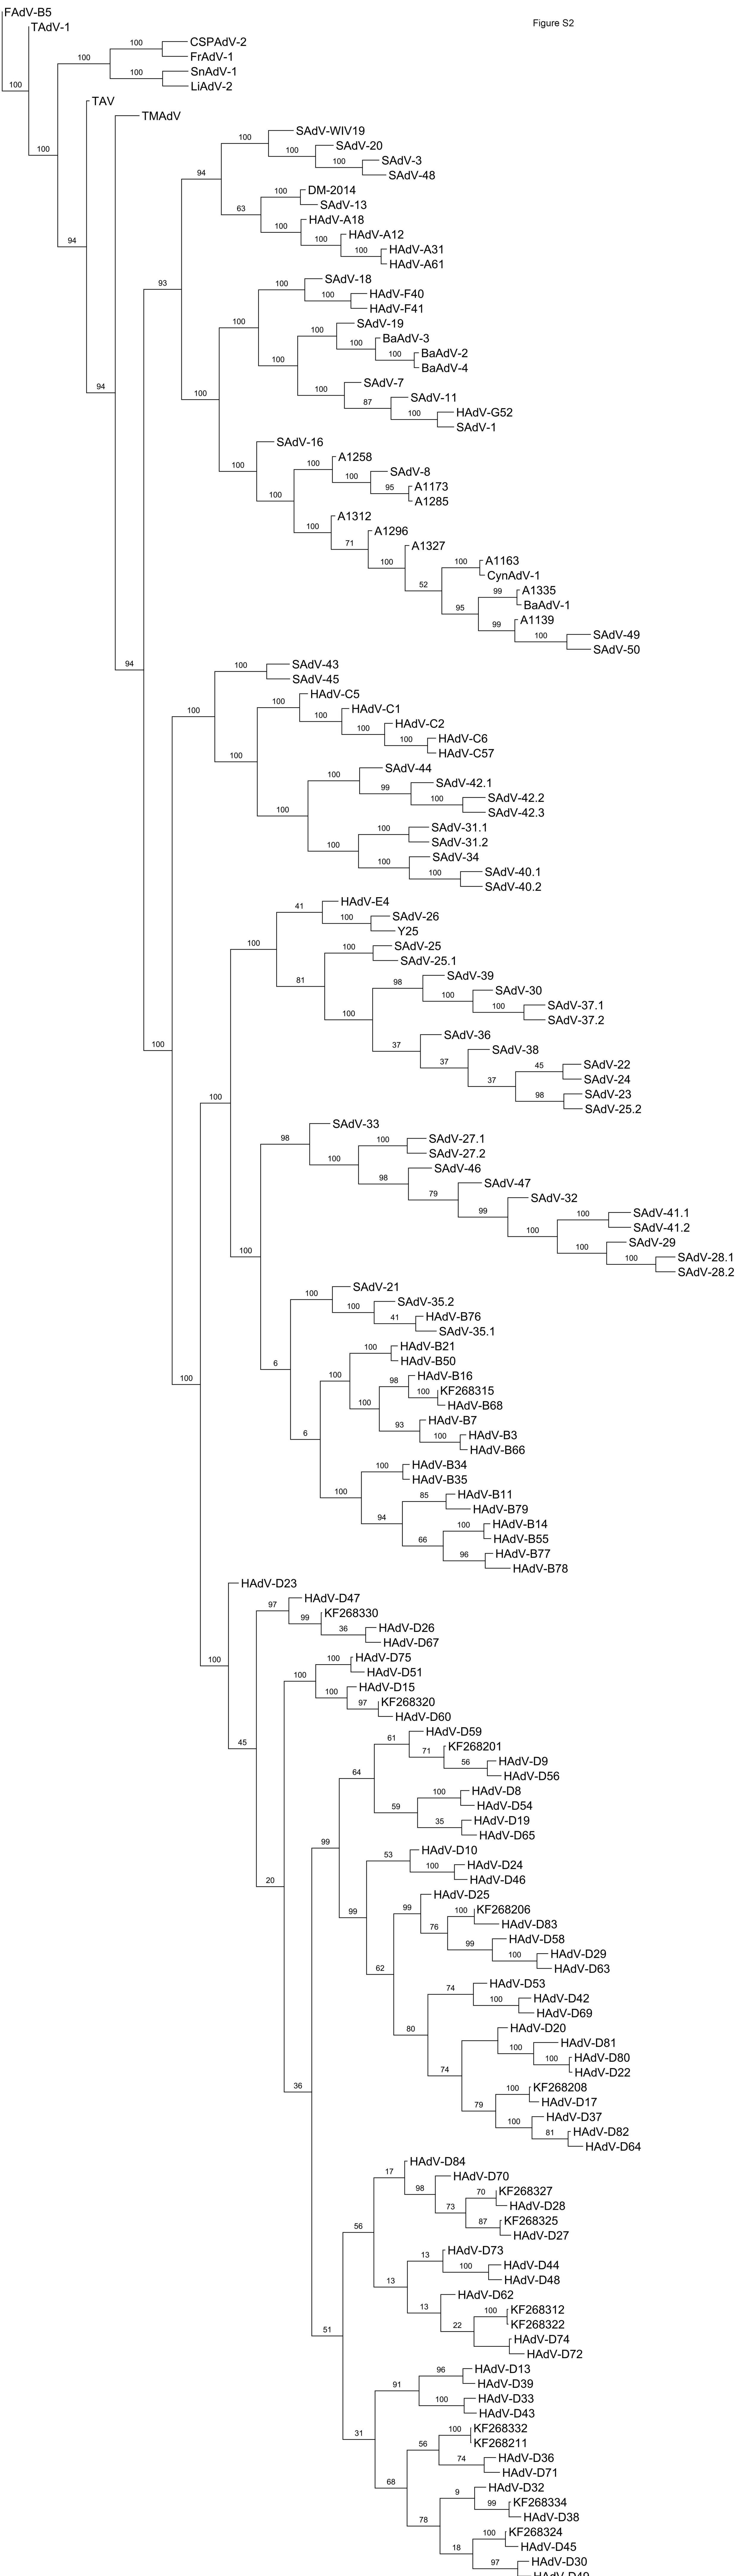

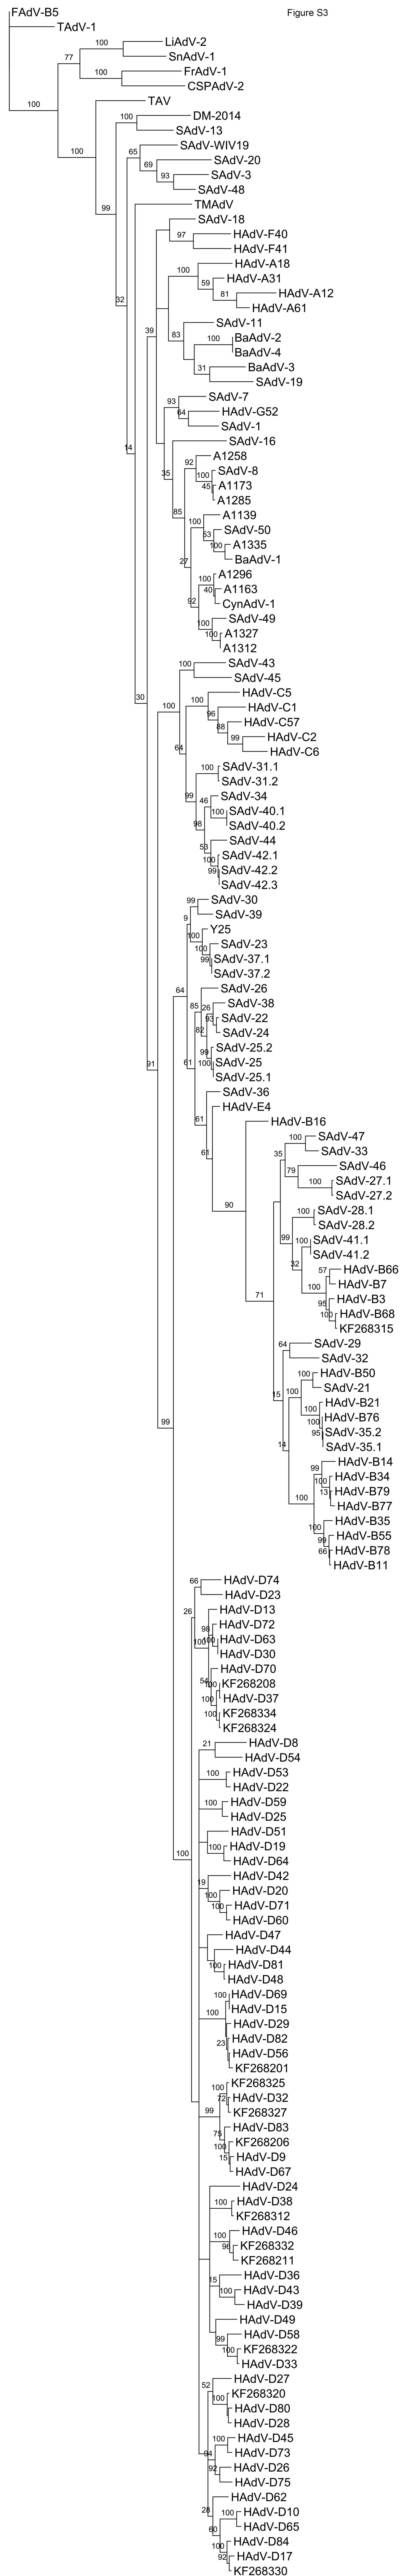

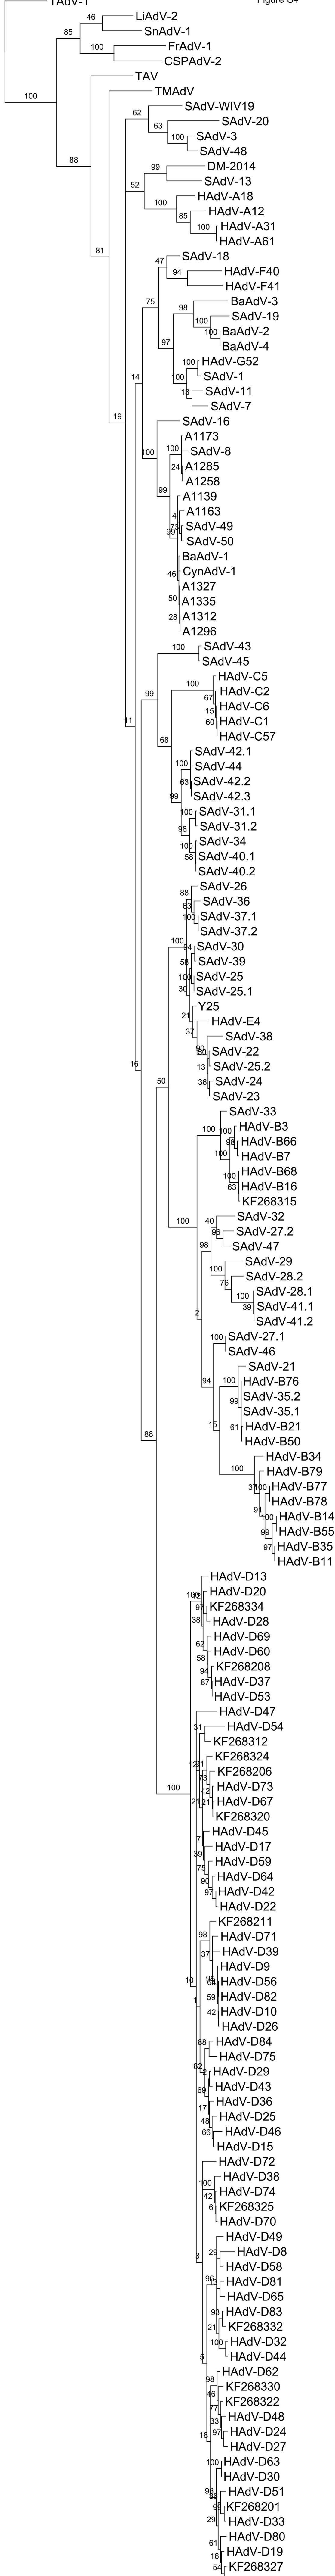



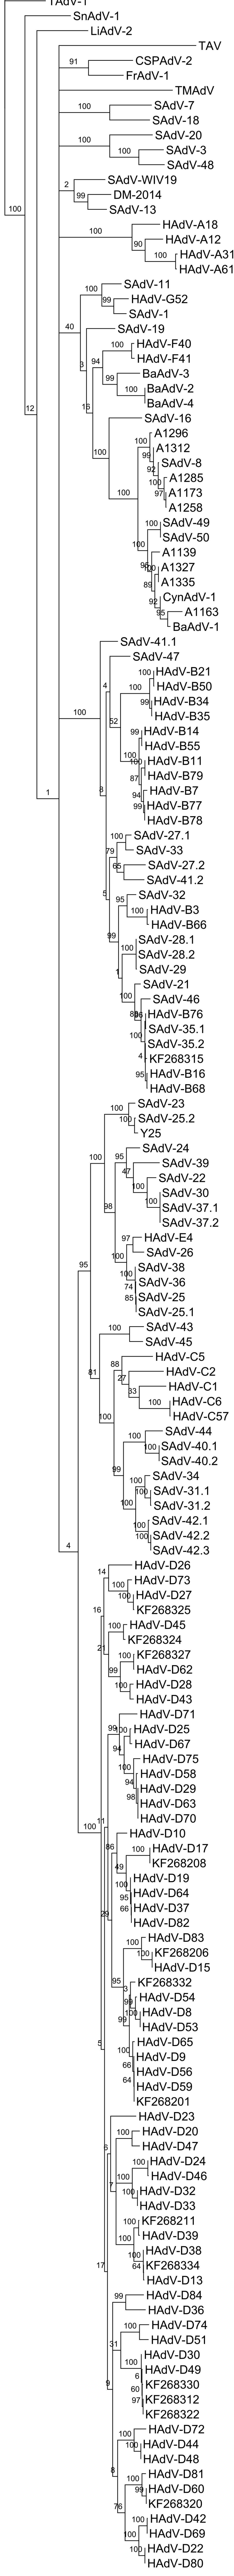

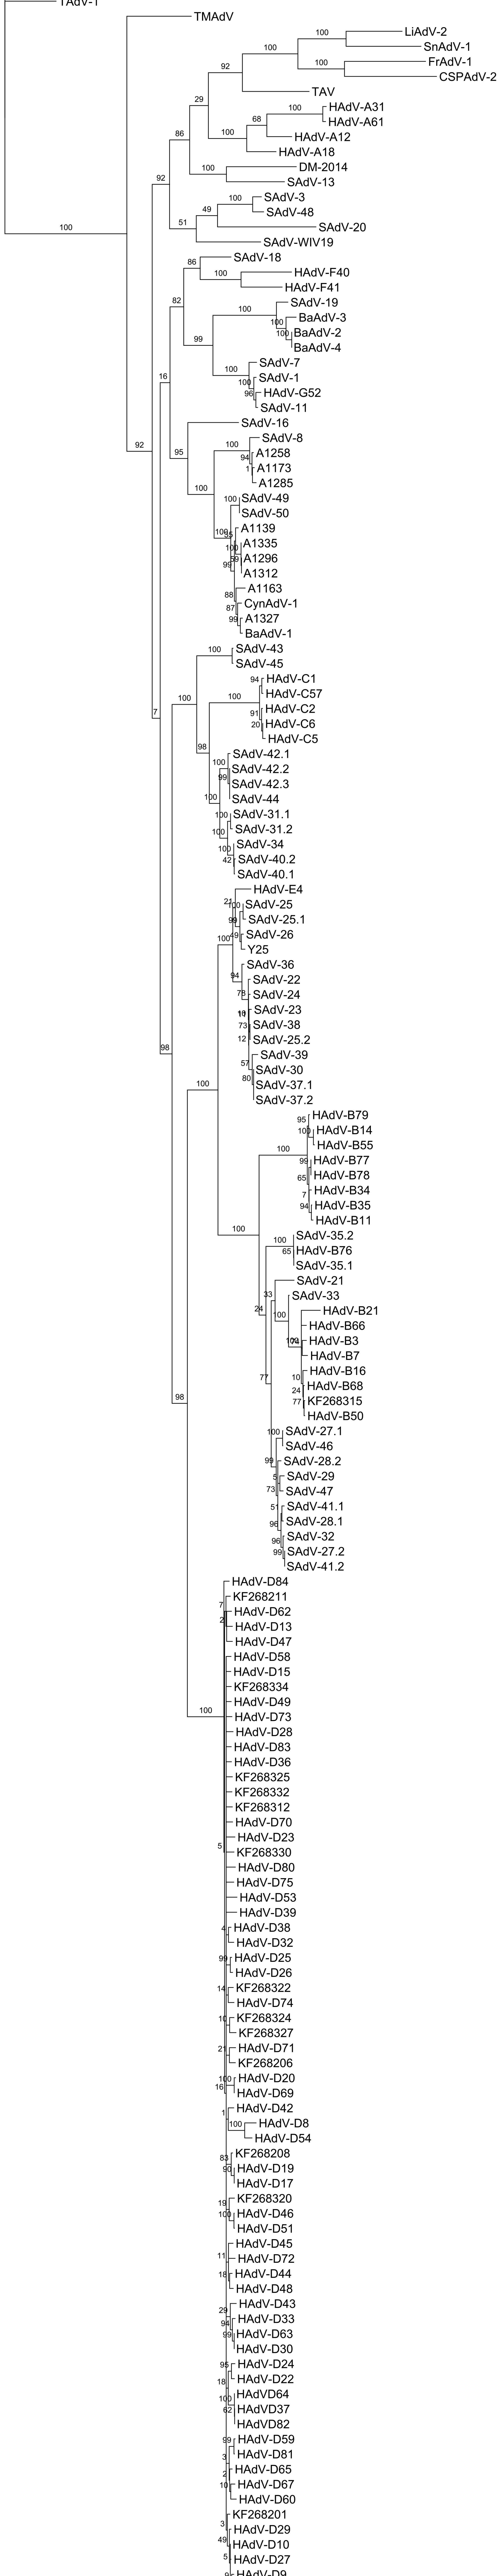

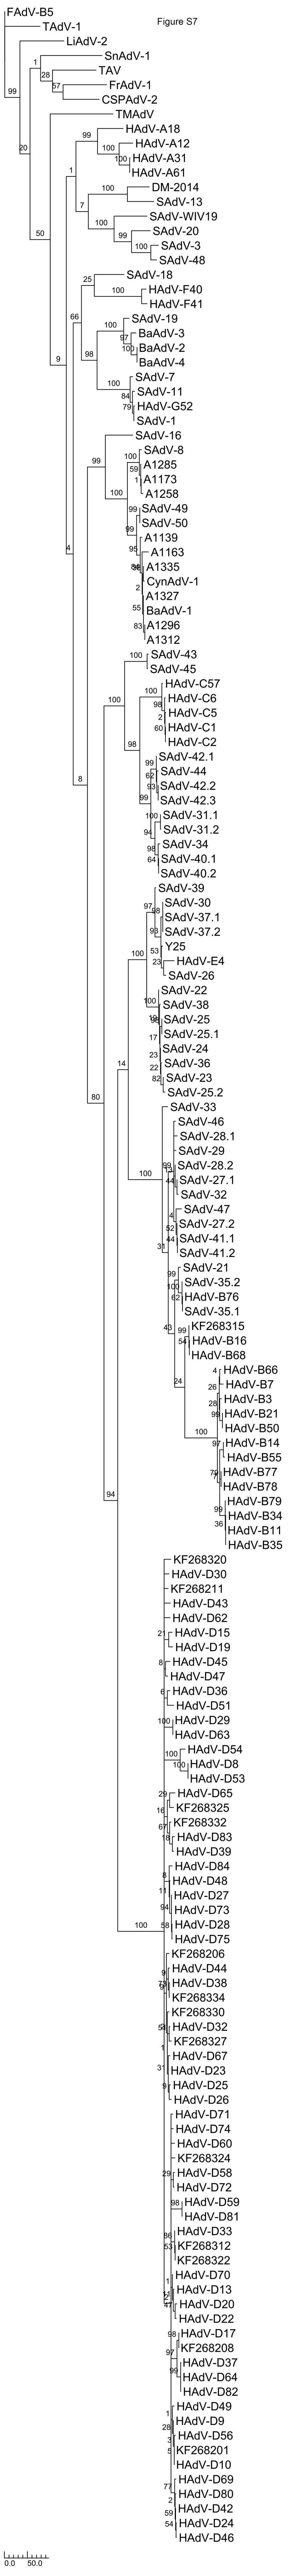

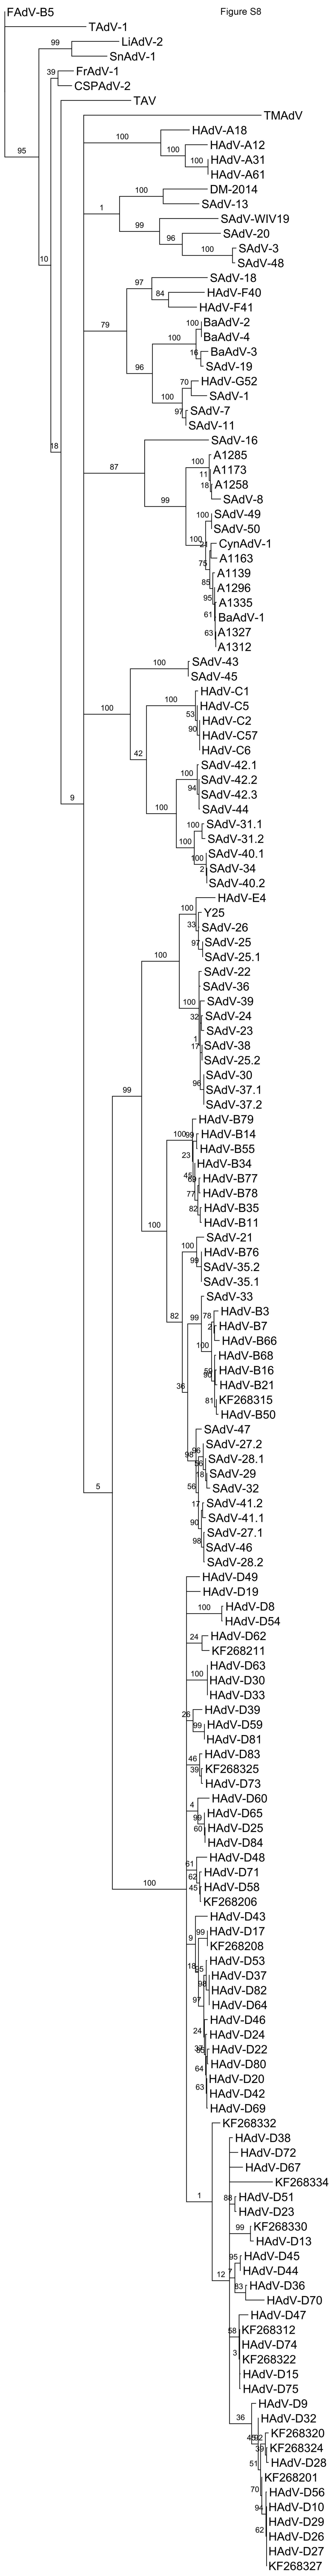

Supplement: NIHMS1787707-supplement-Supplemental_Figures_S1-S8.pdf [file NIHMS1787707-supplement-Supplemental_Figures_S1-S8.pdf]
